# Supplementary material for: Critical In-Water Habitats for Post-Nesting Sea Turtles from the Southern Gulf of Mexico
Source: MDPI journal article supplement (doi:10.3390/jmse9080793), 2021-07-23
Supplement: s1 [file s1]

# Critical in-water habitats for post-nesting sea turtles from the southern Gulf of Mexico

Abigail Uribe-Martínez<sup>1,2</sup>, María de los Angeles Liceaga-Correa<sup>1</sup> and Eduardo Cuevas<sup>1,2,3</sup>

Supplementary Materials.

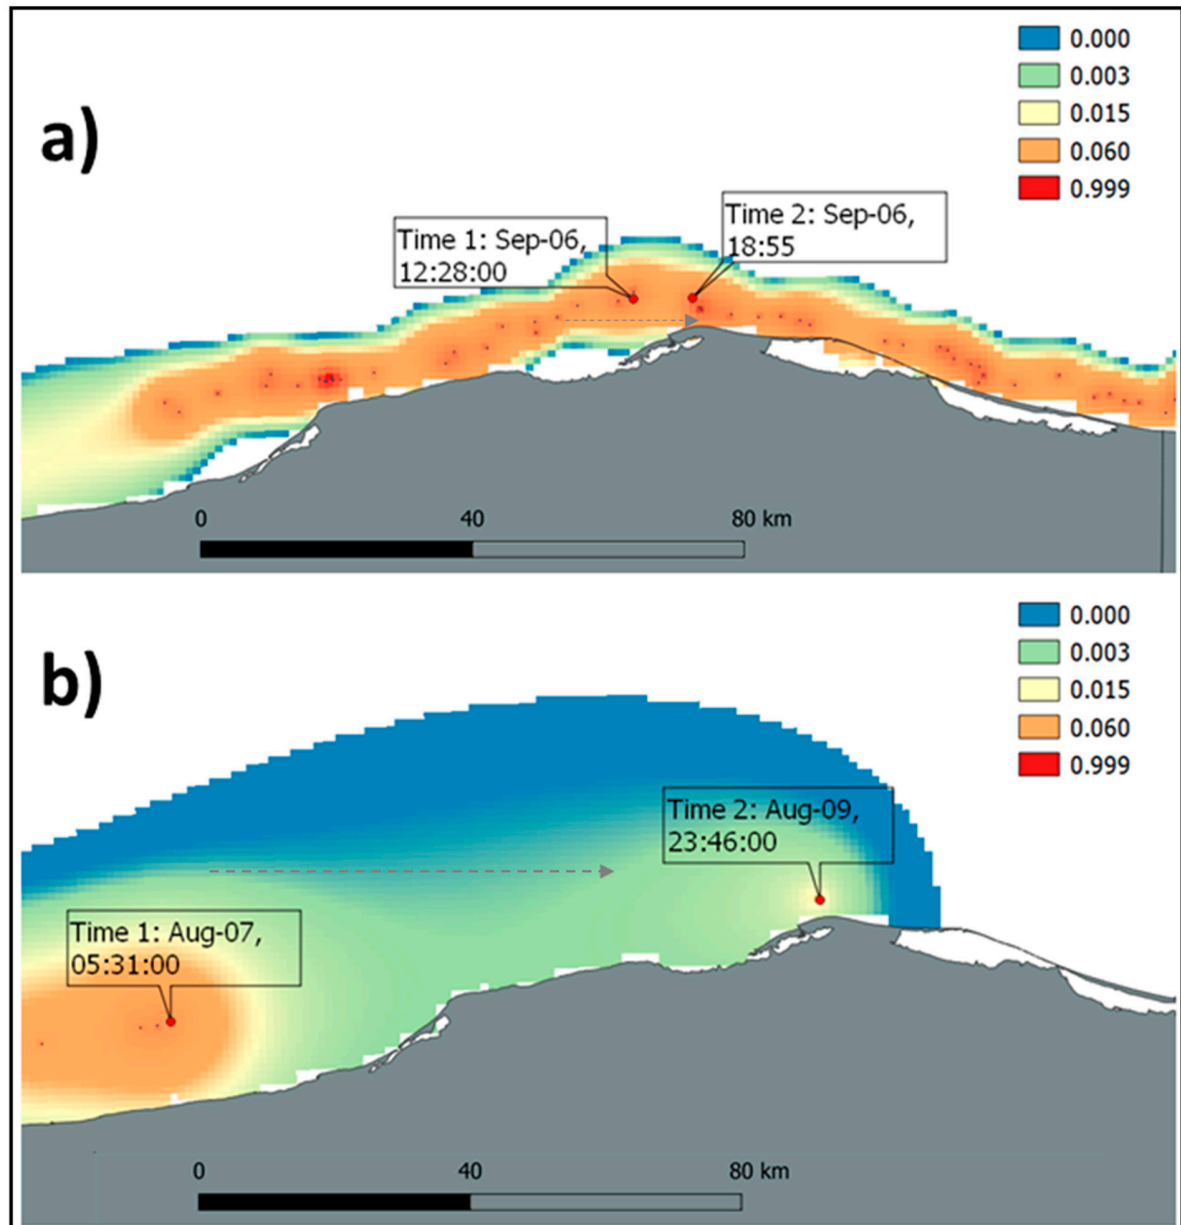

**Figure S1.** Brownian Bridge Movement Model (BBMM) probability surface examples (probability values 0 to 0.999) for two different conditions between consecutive location records, (a) relatively short time elapsed between points and (b) longer time between records, underlining that the shorter

the elapsed time, the narrower the highest probability region. Gray dashed arrows show the direction of the individual movement.

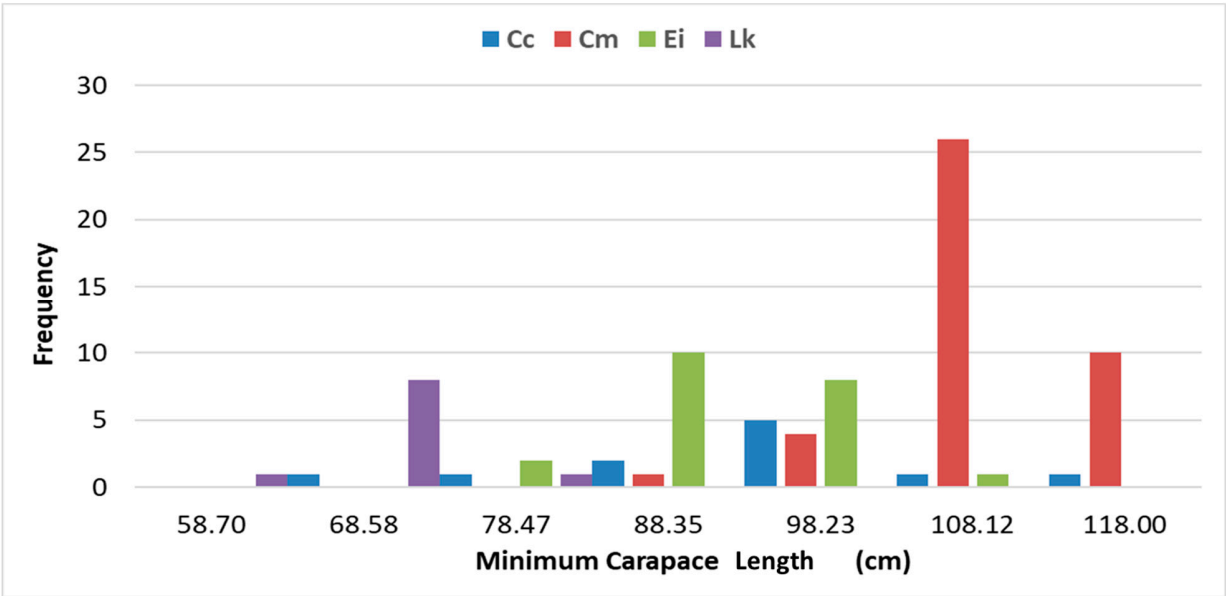

**Figure S2.** Frequency distribution per species of the satellite-tracked post-nesting individuals from the southern Gulf of Mexico.

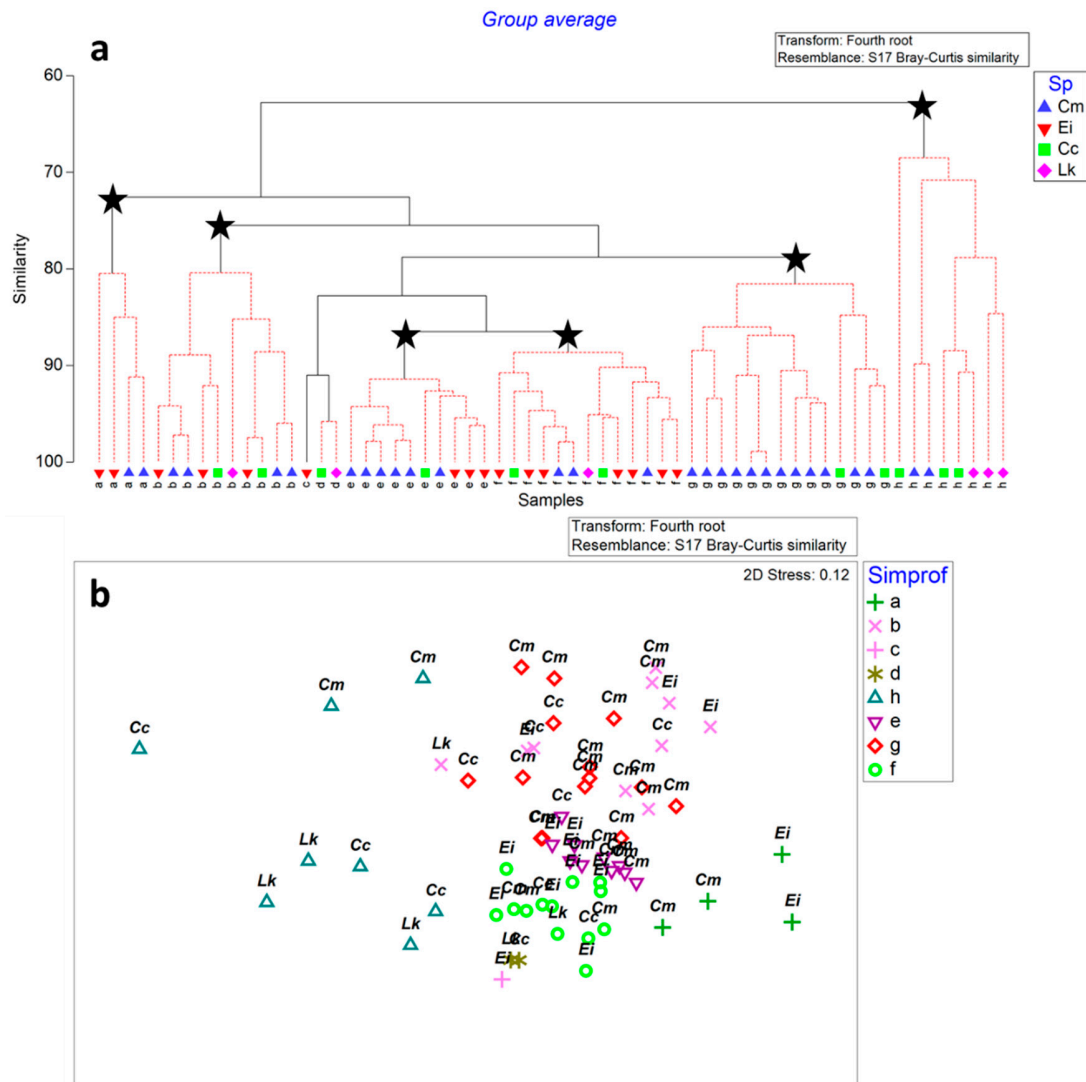

**Figure S3.** Classification plots of the multiple physical variables assessed for the feeding and residency home ranges (50%) of the post-nesting females from the southern Gulf of Mexico. (a) Cluster-by-group average method based on a Bray-Curtis similarity matrix. Red dashed lines represent not significantly different clusters (SIMPROF,  $\alpha = 0.05$ ). Black stars indicate the eight-final described feeding home range clusters. (b) An n-MDS plot for the six classification clusters.

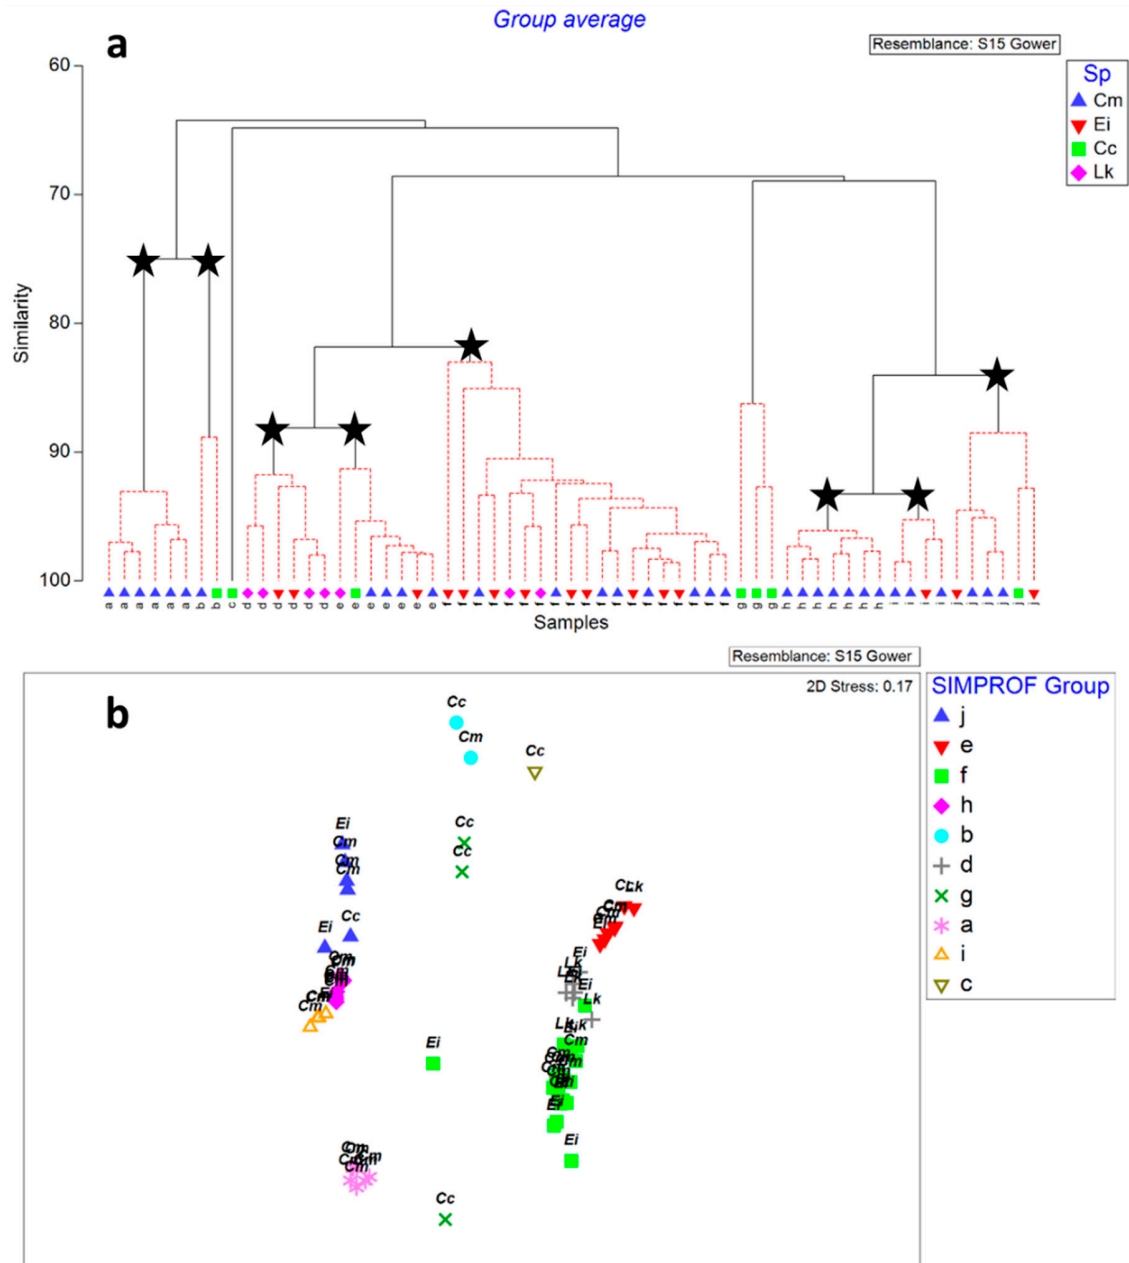

**Figure S4.** Classification plots of the multiple physical variables assessed for the migratory routes of the post-nesting females from the southern Gulf of Mexico. **(a)** Cluster-by-group average method based on a Gower similarity matrix. Red dashed lines represent not significantly different clusters (SIMPROF,  $\alpha = 0.05$ ). Black stars indicate the eight-final described migratory patterns. **(b)** An n-MDS plot for the ten classification clusters.

**Table S1.** Frequency and percentage distribution of the different level classes for all acquired location records before (original) and after (filtered) filtering process. Locations classes A and B represent 80% of data collected. Records with no class location or Z class were eliminated.

| Location Class Distribution |          |       |          |       |
|-----------------------------|----------|-------|----------|-------|
| Location Class              | Original |       | Filtered |       |
|                             | N        | %     | N        | %     |
| No class                    | 4843     | 9.17  | -        | 0.00  |
| 0                           | 1436     | 2.72  | 1164     | 3.26  |
| 1                           | 1419     | 2.69  | 983      | 2.75  |
| 2                           | 1201     | 2.27  | 595      | 1.66  |
| 3                           | 2791     | 5.29  | 430      | 1.20  |
| A                           | 5364     | 10.16 | 4226     | 11.82 |
| B                           | 35,594   | 67.42 | 28,365   | 79.30 |
| Z                           | 149      | 0.28  | -        | 0.00  |
| Total                       | 52,797   |       | 35,763   |       |

**Table S2.** Descriptive statistics of physical variables recorded for migratory routes of post-nesting females of four sea turtle species. Differences in precision levels among variables depend on whether the variable is derived from the ARGOS tracking data (rounded to integer numbers because of its location accuracy) or from ancillary products (presented with tenths or hundredths).

| Migratory routes       |                                                                  |        |       |       |      |          |
|------------------------|------------------------------------------------------------------|--------|-------|-------|------|----------|
|                        |                                                                  | Median | Q 25% | Q 75% | Mean | Std.Dev. |
| Traveled Distance (km) | <i>C. caretta</i>                                                | 971    | 809   | 1532  | 1163 | 690      |
|                        | <i>C. mydas</i>                                                  | 377    | 170   | 661   | 495  | 404      |
|                        | <i>E. imbricata</i>                                              | 439    | 159   | 712   | 519  | 430      |
|                        | <i>L. kempii</i>                                                 | 1453   | 937   | 1894  | 1514 | 696      |
|                        | Kruskal-Wallis chi-squared = 18.216, df = 3, p-value = 0.0003969 |        |       |       |      |          |
| Distance to Coast (km) | <i>C. caretta</i>                                                | 46     | 18    | 87    | 57   | 48       |
|                        | <i>C. mydas</i>                                                  | 29     | 10    | 70    | 47   | 48       |
|                        | <i>E. imbricata</i>                                              | 45     | 13    | 77    | 52   | 44       |
|                        | <i>L. kempii</i>                                                 | 29     | 15    | 48    | 44   | 56       |
|                        | Kruskal-Wallis chi-squared = 85.011, df = 3, p-value < 0.0001    |        |       |       |      |          |
| Depth (m)              | <i>C. caretta</i>                                                | 163    | 18    | 1362  | 1014 | 1488     |
|                        | <i>C. mydas</i>                                                  | 27     | 10    | 1181  | 678  | 1181     |
|                        | <i>E. imbricata</i>                                              | 44     | 15    | 503   | 523  | 1045     |
|                        | <i>L. kempii</i>                                                 | 30     | 17    | 65    | 351  | 876      |
|                        | Kruskal-Wallis chi-squared = 69.269, df = 3, p-value < 0.0001    |        |       |       |      |          |
| Speed (m/s)            | <i>C. caretta</i>                                                | 0.57   | 0.35  | 0.77  | 0.52 | 0.36     |
|                        | <i>C. mydas</i>                                                  | 0.69   | 0.56  | 0.93  | 0.74 | 0.22     |
|                        | <i>E. imbricata</i>                                              | 0.63   | 0.49  | 0.73  | 0.62 | 0.19     |
|                        | <i>L. kempii</i>                                                 | 0.57   | 0.51  | 0.59  | 0.57 | 0.09     |
|                        | Kruskal-Wallis chi-squared = 5.0288, df = 3, p-value = 0.1697    |        |       |       |      |          |

**Table S3.** Descriptive statistics of the internesting home range physical variables of post-nesting females of four sea turtle species. Differences in precision levels among variables depend on whether the variable is derived from the ARGOS tracking data (rounded to integer numbers because of its location accuracy) or from ancillary products (presented with tenths or hundredths).

| Internesting Home Ranges |  |
|--------------------------|--|
|--------------------------|--|

|                                                               |                     | Median | Q 25% | Q 75% | Mean | Std.Dev. |
|---------------------------------------------------------------|---------------------|--------|-------|-------|------|----------|
| Area (km <sup>2</sup> )                                       | <i>C. caretta</i>   | 634    | 347   | 1017  | 1078 | 1258     |
|                                                               | <i>C. mydas</i>     | 189    | 90    | 483   | 2210 | 6121     |
|                                                               | <i>E. imbricata</i> | 670    | 183   | 2520  | 7255 | 22,183   |
|                                                               | <i>L. kempii</i>    | 283    | 163   | 1840  | 1556 | 2418     |
| Kruskal–Wallis chi-squared = 6.9534, df = 3, p-value = 0.0734 |                     |        |       |       |      |          |
| Distance to Coast (km)                                        | <i>C. caretta</i>   | 4      | 2     | 7     | 5    | 4        |
|                                                               | <i>C. mydas</i>     | 3      | 1     | 6     | 6    | 10       |
|                                                               | <i>E. imbricata</i> | 5      | 2     | 13    | 13   | 25       |
|                                                               | <i>L. kempii</i>    | 3      | 1     | 7     | 5    | 5        |
| Kruskal–Wallis chi-squared = 83.687, df = 3, p-value < 0.0001 |                     |        |       |       |      |          |
| Depth (m)                                                     | <i>C. caretta</i>   | 34     | 0     | 227   | 165  | 268      |
|                                                               | <i>C. mydas</i>     | 19     | 4     | 47    | 56   | 185      |
|                                                               | <i>E. imbricata</i> | 10     | 4     | 21    | 46   | 250      |
|                                                               | <i>L. kempii</i>    | 15     | 4     | 25    | 11   | 45       |
| Kruskal–Wallis chi-squared = 64.659, df = 3, p-value < 0.0001 |                     |        |       |       |      |          |
| Slope (%)                                                     | <i>C. caretta</i>   | 1.37   | 0.22  | 3.82  | 2.34 | 2.50     |
|                                                               | <i>C. mydas</i>     | 0.30   | 0.12  | 0.79  | 1.10 | 2.03     |
|                                                               | <i>E. imbricata</i> | 0.09   | 0.04  | 0.23  | 0.33 | 0.99     |
|                                                               | <i>L. kempii</i>    | 0.27   | 0.15  | 0.57  | 0.56 | 0.95     |
| Kruskal–Wallis chi-squared = 368.69, df = 3, p-value < 0.0001 |                     |        |       |       |      |          |

**Table S4.** Descriptive statistics of the feeding home range physical variables of post-nesting females of four sea turtle species. Differences in precision levels among variables depend on whether the variable is derived from the ARGOS tracking data (rounded to integer numbers because of its location accuracy) or from ancillary products (presented with tenths or hundredths).

| Feeding home ranges                                             |                     |        |       |        |        |          |
|-----------------------------------------------------------------|---------------------|--------|-------|--------|--------|----------|
|                                                                 |                     | Median | Q 25% | Q 75%  | Mean   | Std.Dev. |
| Area (km <sup>2</sup> )                                         | <i>C. caretta</i>   | 358    | 157   | 1236   | 13,444 | 41,195   |
|                                                                 | <i>C. mydas</i>     | 137    | 66    | 224    | 315    | 757      |
|                                                                 | <i>E. imbricata</i> | 166    | 79    | 385    | 250    | 233      |
|                                                                 | <i>L. kempii</i>    | 3207   | 668   | 11,697 | 11,218 | 18,005   |
| Kruskal–Wallis chi-squared = 12.997, df = 3, p-value = 0.004643 |                     |        |       |        |        |          |
| Distance to Coast (km)                                          | <i>C. caretta</i>   | 17     | 5     | 48     | 28     | 27       |
|                                                                 | <i>C. mydas</i>     | 6      | 2     | 11     | 9      | 10       |
|                                                                 | <i>E. imbricata</i> | 10     | 4     | 19     | 20     | 35       |
|                                                                 | <i>L. kempii</i>    | 38     | 25    | 68     | 44     | 29       |
| Kruskal–Wallis chi-squared = 346.88, df = 3, p-value < 0.0001   |                     |        |       |        |        |          |
| Depth (m)                                                       | <i>C. caretta</i>   | 23     | 15    | 35     | 67     | 167      |
|                                                                 | <i>C. mydas</i>     | 10     | 4     | 31     | 41     | 111      |
|                                                                 | <i>E. imbricata</i> | 13     | 4     | 22     | 15     | 15       |
|                                                                 | <i>L. kempii</i>    | 22     | 14    | 38     | 25     | 15       |
| Kruskal–Wallis chi-squared = 127.82, df = 3, p-value < 0.0001   |                     |        |       |        |        |          |
| Slope (%)                                                       | <i>C. caretta</i>   | 0.15   | 0.07  | 0.32   | 0.49   | 1.03     |
|                                                                 | <i>C. mydas</i>     | 0.13   | 0.04  | 0.52   | 0.51   | 1.10     |
|                                                                 | <i>E. imbricata</i> | 0.07   | 0.04  | 0.15   | 0.14   | 0.22     |
|                                                                 | <i>L. kempii</i>    | 0.05   | 0.02  | 0.08   | 0.06   | 0.06     |
| Kruskal–Wallis chi-squared = 177.97, df = 3, p-value < 0.0001   |                     |        |       |        |        |          |
